# Supplementary material
Source: Springer Nature journal article supplement (http://www.springermedizin.de/resource/supplementary/12935_2008_225_MOESM2_ESM.pdf/9541354)

Sulforaphane ( $\mu\text{M}$ )

BITC ( $\mu\text{M}$ )

NT

10

20

50

10

20

50

Neg.

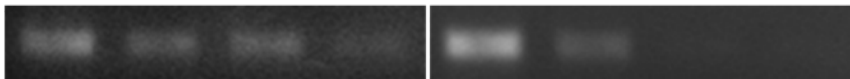

Cyclin D1

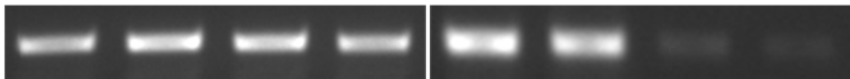

Survivin

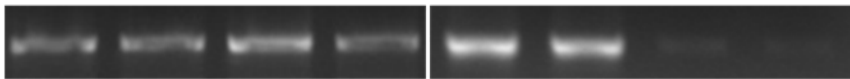

Bcl-XI

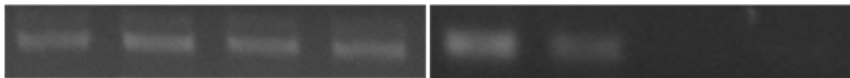

VEGF

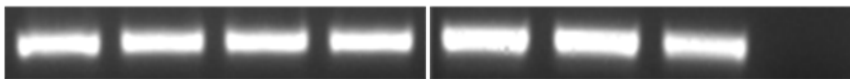

GAPDH

Supplement: MOESM2 [file 9541354]
